# Supplementary material
Source: HighWire-hosted journal article supplement (https://thorax.bmj.com/content/72/2/109)
Supplement: inline-supplementary-material-1 [file inline-supplementary-material-1.pdf]

| first author      | year | prevalence | total n | unselected sample= 1 | cut-off level (ppb) FENO | NIOX Mino=1 NIOX Flex=2 other=0 | Chemolumi = 1 Electrochem = 0 | Other chemo=0 Niox Mino=1 Niox Flex=2 other electro=3 | age group adults = 1 | >90% provo = 1 | diagn only with provo = 1 | Dimens ions with low RoB | key study = 1 | sensitivity reported | specificity reported | True positive | False negative | Fals positive | True negative |
|-------------------|------|------------|---------|----------------------|--------------------------|---------------------------------|-------------------------------|-------------------------------------------------------|----------------------|----------------|---------------------------|--------------------------|---------------|----------------------|----------------------|---------------|----------------|---------------|---------------|
| Arora             | 2006 | 0,8023     | 172     | 0                    | 17                       |                                 |                               |                                                       | 1                    | 1              | 1                         | 5                        | 1             | 0,6300               | 0,5880               | 87            | 51             | 14            | 20            |
| Cordeiro          | 2011 | 0,3684     | 114     | 1                    | 27                       | 2                               | 1                             | 2                                                     | 1                    | 0              | 0                         | 5                        | 1             | 0,7800               | 0,9200               | 33            | 9              | 6             | 66            |
| ElHalawani        | 2003 | 0,1429     | 49      | 0                    | 12                       | 0                               | 1                             | 0                                                     | 1                    | 0              | 0                         | 3                        | 0             | 1,0000               | 0,3100               | 7             | 0              | 29            | 13            |
| Florentin         | 2014 | 0,1067     | 178     | 0                    | 10,5                     | 1                               | 0                             | 1                                                     | 1                    | 0              | 0                         | 1                        | 0             | 0,6840               | 0,5600               | 13            | 6              | 70            | 89            |
| Fortuna           | 2007 | 0,4400     | 50      | 1                    | 20                       | 0                               | 1                             | 0                                                     | 1                    | 1              | 1                         | 6                        | 1             | 0,7700               | 0,6400               | 17            | 5              | 10            | 18            |
| Fukuhara          | 2011 | 0,6885     | 61      | 0                    | 40                       | 0                               | 1                             | 0                                                     | 1                    | 1              | 0                         | 4                        | 0             | 0,7860               | 0,8950               | 33            | 9              | 2             | 17            |
| Giovannini        | 2014 | 0,5000     | 42      | 1                    | 30                       | 0                               | 0                             | 3                                                     | 1                    | 1              | 1                         | 2                        | 0             | 0,1400               | 1,0000               | 3             | 18             | 0             | 21            |
| Heffler           | 2006 | 0,3750     | 48      | 0                    | 36                       | 2                               | 1                             | 2                                                     | 1                    | 0              | 0                         | 4                        | 0             | 0,7800               | 0,6000               | 14            | 4              | 12            | 18            |
| Katsoulis         | 2013 | 0,4286     | 112     | 0                    | 32                       | 1                               | 0                             | 1                                                     | 1                    | 1              | 1                         | 4                        | 0             | 0,4700               | 0,8500               | 23            | 25             | 10            | 54            |
| Kostikas          | 2008 | 0,4228     | 149     | 0                    | 19                       | 1                               | 0                             | 1                                                     | 1                    | 0              | 0                         | 5                        | 0             | 0,5240               | 0,8530               | 33            | 30             | 13            | 73            |
| Kowal             | 2009 | 0,3296     | 540     | 0                    | 40                       | 0                               | 1                             | 0                                                     | 1                    | 1              | 0                         | 4                        | 0             | 0,8830               | 0,8260               | 157           | 21             | 63            | 299           |
| Linkosalo         | 2012 | 0,6000     | 30      | 0                    | 20                       | 0                               | 1                             | 0                                                     | 0                    | 0              | 0                         | 4                        | 0             | 0,7200               | 0,8300               | 13            | 5              | 2             | 10            |
| Malinovskyi       | 2012 | 0,2875     | 112     | 0                    | 17                       | 1                               | 0                             | 1                                                     | 1                    | 1              | 0                         | 2                        | 0             | 0,5630               | 0,8250               | 18            | 14             | 14            | 66            |
| Malinovskyi ex-sr | 2012 | 0,3065     | 62      | 0                    | 22                       | 1                               | 0                             | 1                                                     | 1                    | 1              | 0                         | 2                        | 0             | 0,6320               | 0,8610               | 12            | 7              | 6             | 37            |
| Malinovskyi never | 2012 | 0,4167     | 108     | 0                    | 15                       | 1                               | 0                             | 1                                                     | 1                    | 1              | 0                         | 2                        | 0             | 0,7780               | 0,6350               | 35            | 10             | 23            | 40            |
| Pedrosa           | 2010 | 0,3070     | 114     | 1                    | 40                       | 1                               | 0                             | 1                                                     | 1                    | 1              | 1                         | 4                        | 0             | 0,7430               | 0,7250               | 26            | 9              | 22            | 57            |
| Pizzimenti        | 2009 | 0,0897     | 156     | 0                    | 55                       | 1                               | 0                             | 1                                                     | 1                    | 1              | 1                         | 4                        | 0             | 0,7800               | 0,8800               | 11            | 3              | 17            | 125           |
| Sato              | 2008 | 0,6761     | 71      | 1                    | 38,8                     | 0                               | 1                             | 0                                                     | 1                    | 1              | 0                         | 5                        | 1             | 0,7920               | 0,9130               | 38            | 10             | 2             | 21            |
| Schleich          | 2012 | 0,4713     | 174     | 0                    | 34                       | 2                               | 1                             | 2                                                     | 1                    | 1              | 1                         | 6                        | 0             | 0,3540               | 0,9540               | 29            | 53             | 4             | 88            |
| Schneider         | 2013 | 0,3919     | 393     | 1                    | 25                       | 1                               | 0                             | 1                                                     | 1                    | 1              | 0                         | 6                        | 1             | 0,4900               | 0,7500               | 75            | 79             | 60            | 179           |
| Sivan             | 2009 | 0,6106     | 113     | 1                    | 19                       | 0                               | 1                             | 0                                                     | 0                    | 0              | 0                         | 5                        | 1             | 0,8600               | 0,8900               | 59            | 10             | 5             | 39            |
| Smith             | 2004 | 0,3617     | 47      | 1                    | 20                       | 0                               | 1                             | 0                                                     | 1                    | 1              | 0                         | 6                        | 1             | 0,8750               | 0,7860               | 15            | 2              | 6             | 24            |
| Smith             | 2005 | 0,5192     | 52      | 1                    | 47                       | 2                               | 1                             | 2                                                     | 1                    | 1              | 0                         | 4                        | 0             | 0,5556               | 0,9200               | 15            | 12             | 2             | 23            |
| Tilemann          | 2011 | 0,4095     | 210     | 1                    | 46                       | 1                               | 0                             | 1                                                     | 1                    | 0              | 0                         | 6                        | 1             | 0,2900               | 0,9200               | 25            | 61             | 10            | 114           |
| Voutilainen       | 2013 | 0,3448     | 87      | 0                    | 30                       | 2                               | 1                             | 2                                                     | 1                    | 1              | 0                         | 5                        | 0             | 0,4300               | 0,8900               | 13            | 17             | 6             | 51            |
| Wang bronchodile  | 2015 | 0,3502     | 515     | 1                    | 41                       | 0                               |                               |                                                       | 1                    | 0              | 0                         | 3                        | 0             | 0,7243               | 0,7485               | 134           | 51             | 83            | 247           |
| Wang bronchopro   | 2015 | 0,3064     | 408     | 1                    | 64                       | 0                               |                               |                                                       | 1                    | 1              | 1                         | 3                        | 0             | 0,5200               | 0,9435               | 65            | 60             | 16            | 327           |
| Woo               | 2012 | 0,6816     | 245     | 1                    | 21                       | 1                               | 0                             | 1                                                     | 0                    | 1              | 0                         | 5                        | 1             | 0,5690               | 0,8720               | 95            | 72             | 10            | 68            |
| Zhang             | 2011 | 0,3679     | 106     | 0                    | 40                       | 1                               | 0                             | 1                                                     | 1                    | 1              | 0                         | 2                        | 0             | 0,7500               | 0,8600               | 29            | 10             | 9             | 58            |
